# Supplementary material for: Infants tailor their attention to maximize learning
Source: PubMed Central journal article supplement — Sci Adv. 2020 Sep 23;6(39):eabb5053. doi: 10.1126/sciadv.abb5053 (PMC7531891; doi:10.1126/sciadv.abb5053), 2020-09-23
Supplement: abb5053_SM.pdf [file abb5053_SM.pdf]

[advances.sciencemag.org/cgi/content/full/6/39/eabb5053/DC1](https://advances.sciencemag.org/cgi/content/full/6/39/eabb5053/DC1)

## Supplementary Materials for

### **Infants tailor their attention to maximize learning**

F. Poli\*, G. Serino, R. B. Mars, S. Hunnius

\*Corresponding author. Email: [f.poli@donders.ru.nl](mailto:f.poli@donders.ru.nl)

Published 23 September 2020, *Sci. Adv.* **6**, eabb5053 (2020)  
DOI: 10.1126/sciadv.abb5053

#### **The PDF file includes:**

Tables S1 to S5  
Legend for movie S1

#### **Other Supplementary Material for this manuscript includes the following:**

(available at [advances.sciencemag.org/cgi/content/full/6/39/eabb5053/DC1](https://advances.sciencemag.org/cgi/content/full/6/39/eabb5053/DC1))

Movie S1

**Table S1.**

Table 1: Model comparison

| Model                                | AIC   | $\Delta AIC$ | BIC   | $\Delta BIC$ |
|--------------------------------------|-------|--------------|-------|--------------|
| $D_{KL}$ , I, H, Time                | 1,251 | 0            | 1,389 | 0            |
| $D_{KL}$ , I, Time                   | 1,263 | 12           | 1,406 | 17           |
| $D_{KL}$ , H, Time                   | 1,265 | 13           | 1,443 | 19           |
| $D_{KL}$ , I, H, Time (no smoothing) | 1,269 | 17           | 1,402 | 13           |
| I, H, Time                           | 1,279 | 27           | 1,533 | 144          |
| $D_{KL}$ , Time                      | 1,281 | 30           | 1,492 | 103          |
| H, Time                              | 1,283 | 32           | 1,517 | 128          |
| I, Time                              | 1,286 | 34           | 1,507 | 118          |
| Time                                 | 1,286 | 34           | 1,504 | 115          |
| $D_{KL}$ , I, H                      | 1,349 | 97           | 1,419 | 30           |
| $D_{KL}$ , I                         | 1,357 | 106          | 1,429 | 40           |
| $D_{KL}$ , H                         | 1,365 | 114          | 1,429 | 40           |
| $D_{KL}$                             | 1,389 | 138          | 1,432 | 43           |
| I, H                                 | 1,464 | 212          | 1,538 | 149          |
| I                                    | 1,466 | 215          | 1,541 | 152          |
| H                                    | 1,476 | 225          | 1,517 | 128          |

I = Surprise, H = Unpredictability,  $D_{KL}$  = Learning Progress. Time always includes two independent variables: sequence-wise time and task-wise time.

**Table S2.**

Table 2: Smoothing Coefficients

|                      | $\chi^2$ | edf | p-values |
|----------------------|----------|-----|----------|
| Surprise             | 21.87    | 1   | <0.001   |
| Predictability       | 19.38    | 3   | <0.001   |
| Learning Progress    | 48.87    | 4   | <0.001   |
| Time (sequence-wise) | 46.68    | 7   | <0.001   |
| Time (task-wise)     | 39.35    | 4   | <0.001   |

Wald Chi-squared test for every smoothing coefficient, expected degrees of freedom (edf) and significance values.

**Table S3.**

Table 3: Beta Coefficients

|                   | $\beta$ coeff. | Std. Error | p-values | $e^{ \beta }$ |
|-------------------|----------------|------------|----------|---------------|
| Surprise          | 0.89           | 0.17       | <0.001   | 2.44          |
| Predictability    | 0.24           | 0.05       | <0.001   | 1.27          |
| Learning Progress | -1.95          | 0.36       | <0.001   | 7.02          |

Beta coefficients with the relative standard errors, significance values and effect sizes.

**Table S4.**

Table 4: Saccadic Latencies

|                   | $\beta$ coeff. | Std. Error | t-value | p-values |
|-------------------|----------------|------------|---------|----------|
| Surprise          | 0.08           | 0.03       | 2.70    | 0.006    |
| Predictability    | 0.16           | 0.03       | 4.57    | <0.001   |
| Learning Progress | -0.002         | 0.03       | -0.07   | 0.94     |
| Time              | 0.001          | <0.001     | 1.44    | 0.15     |

Results from the generalized linear model with logistic distribution of saccadic latencies.

**Table S5.**

Table 5: Looking Time

|                    | $\beta$ coeff. | Std. Error | t-value | p-values |
|--------------------|----------------|------------|---------|----------|
| Surprise           | -0.04          | 0.02       | -1.82   | 0.069    |
| Predictability     | -0.04          | 0.03       | -1.48   | 0.139    |
| Learning Progress  | 0.06           | 0.03       | 2.42    | 0.016    |
| Time               | -0.01          | <0.001     | -10.23  | <0.001   |
| Saccadic Latencies | -0.63          | 0.02       | -37.20  | <0.001   |

Results from the generalized linear model with logistic distribution of looking time to the target.

**Movie S1.**

An example sequence as it was presented to infants.
